# Supplementary material for: Methylation analysis of histone H4K12ac-associated promoters in sperm of healthy donors and subfertile patients
Source: PubMed Central journal article supplement (PMC4372182; doi:10.1186/s13148-015-0058-4), 2015-03-19

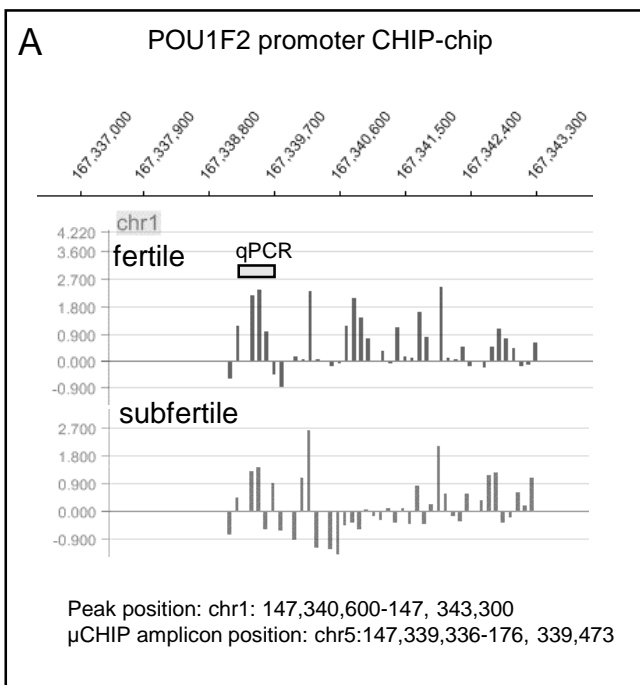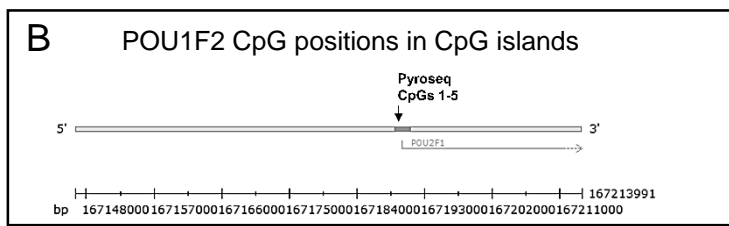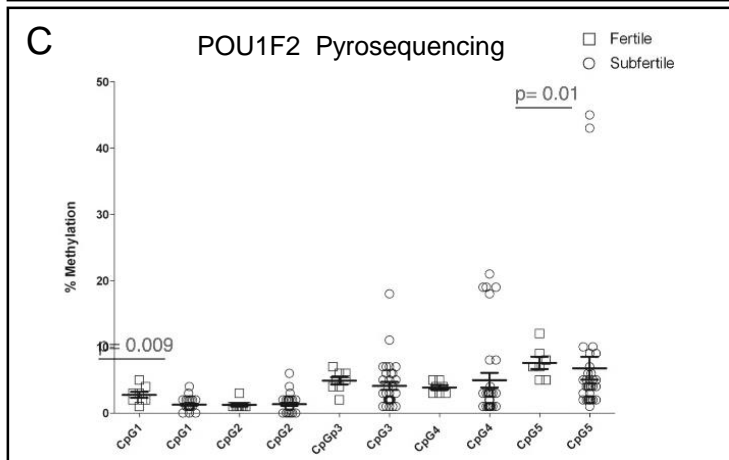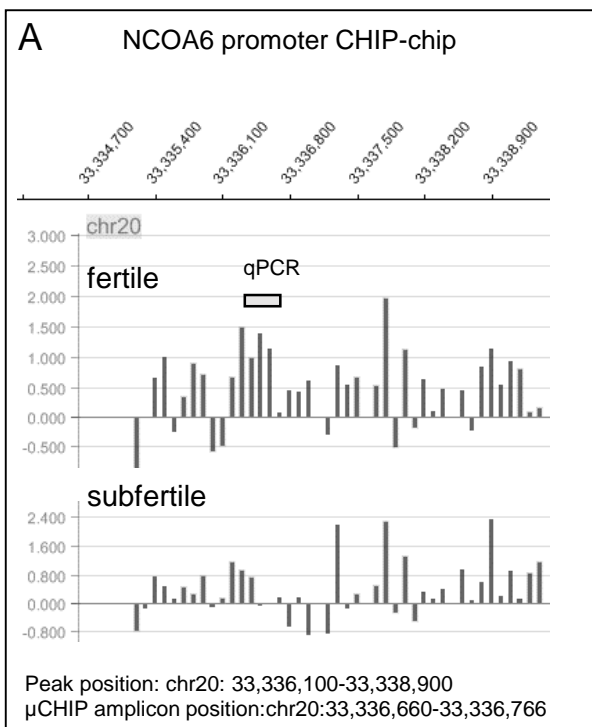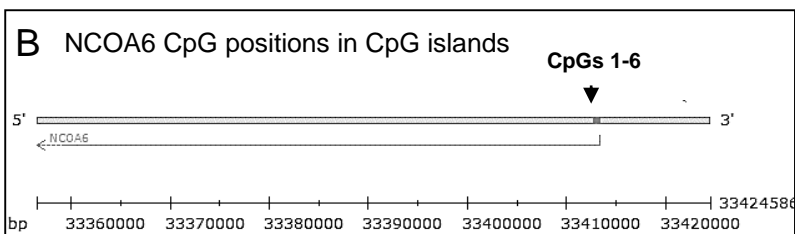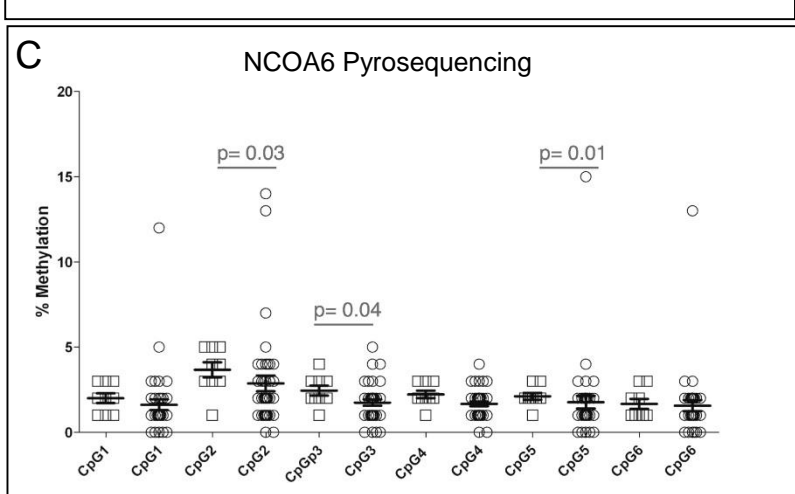

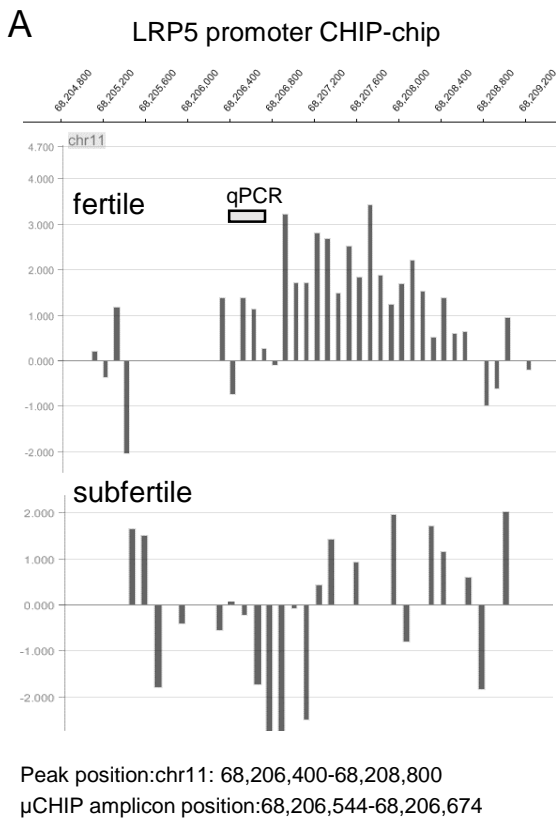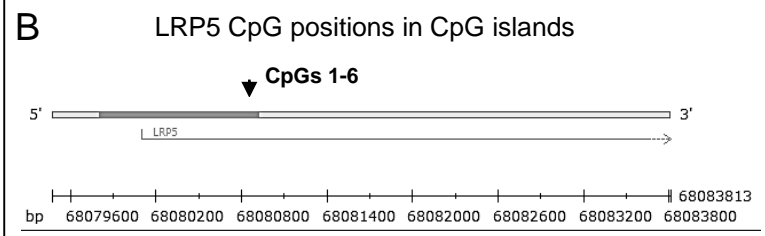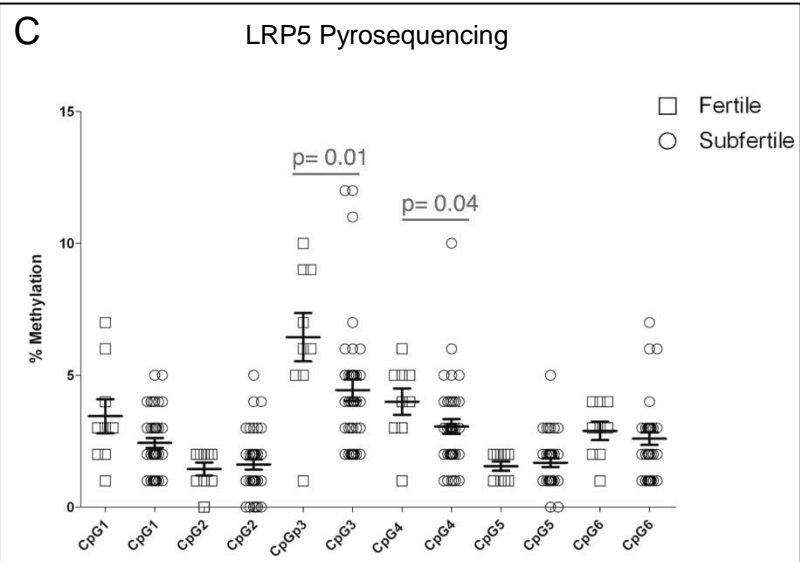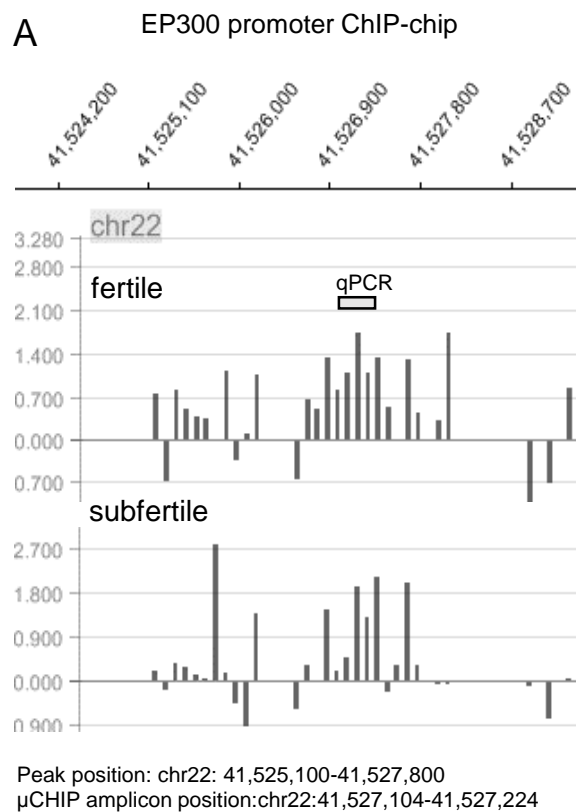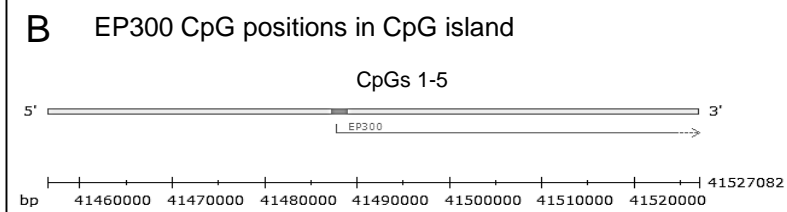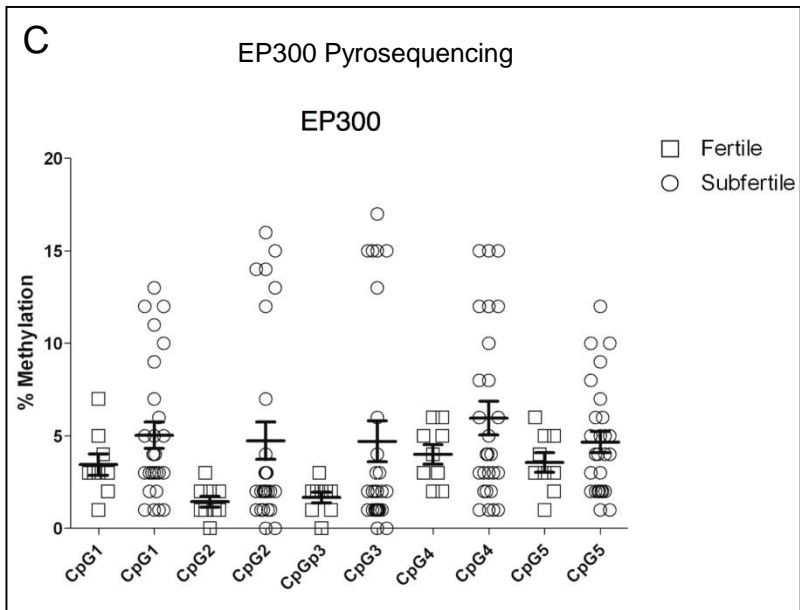

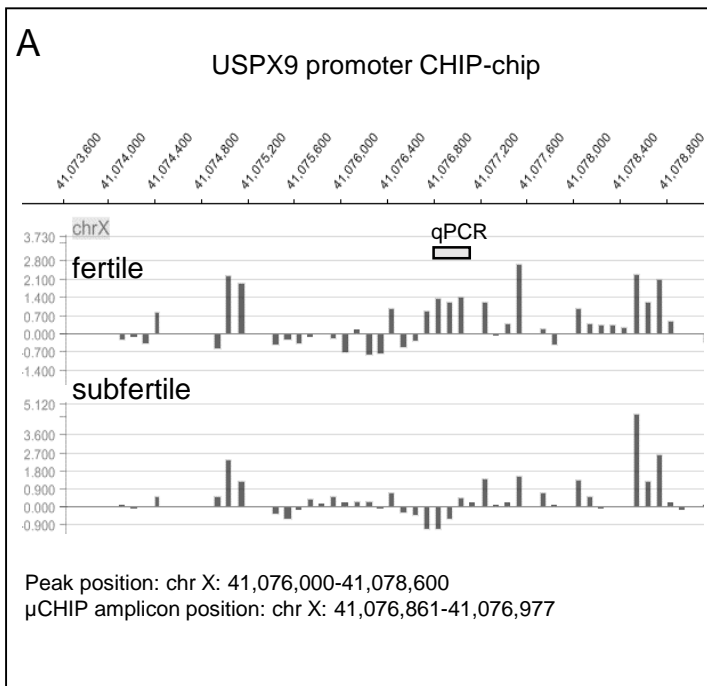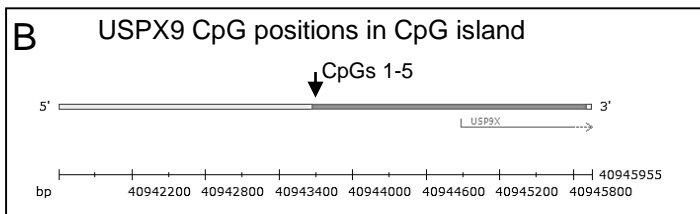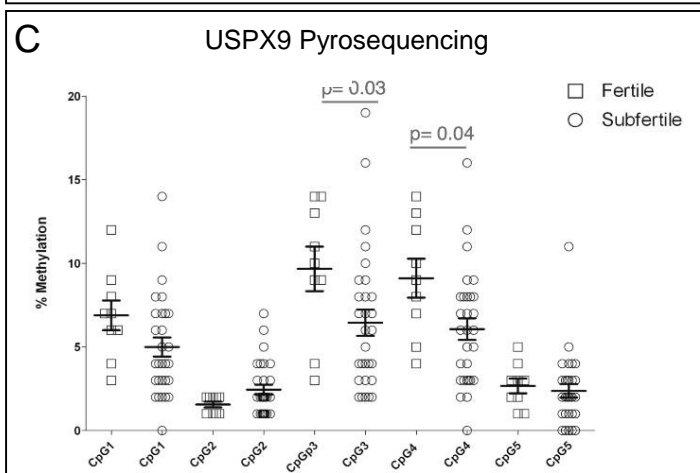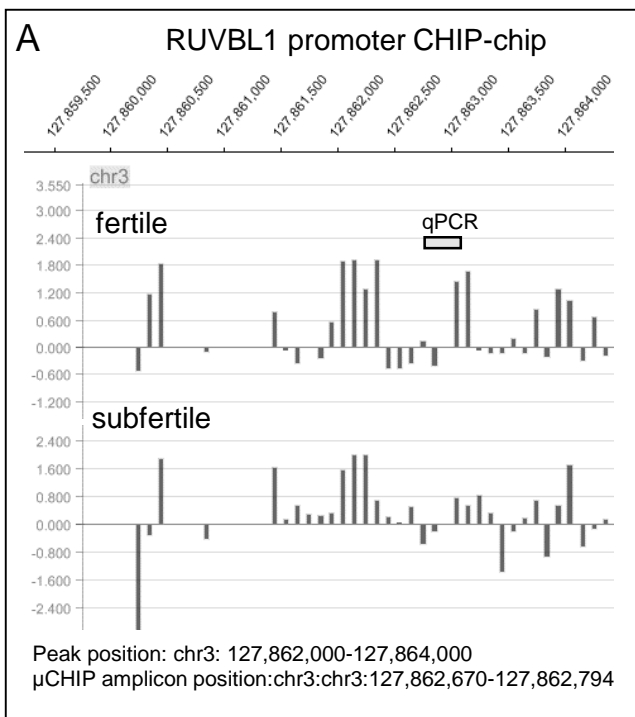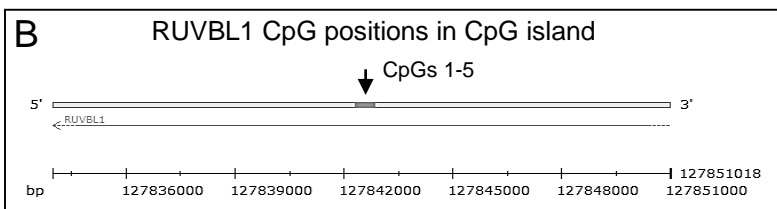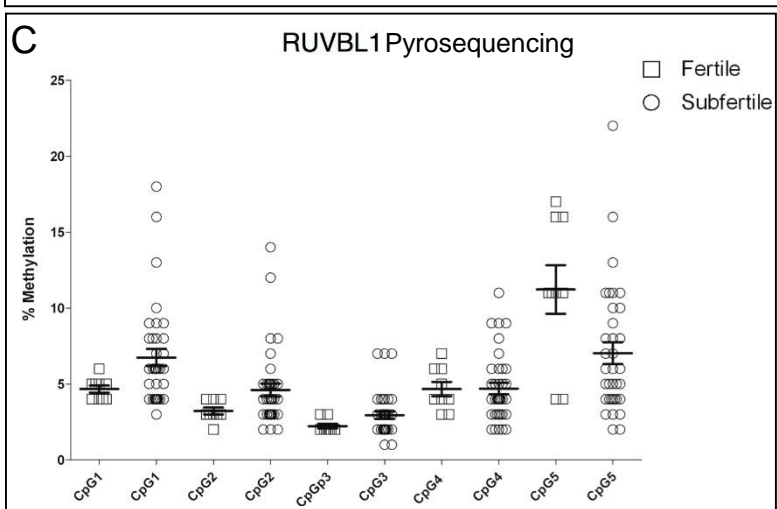

Supplement: 13148_2015_58_MOESM1_ESM.pdf [file 13148_2015_58_MOESM1_ESM.pdf]
